# Supplementary material
Source: Elsevier journal article supplement (https://www.sciencedirect.com/science/article/pii/S2173507721001502)
Supplement: mmc1 [file S2173507721001502:mmc1.docx]

**Anexo 1 :**

<https://forms.gle/4cRtShfGynhqEcbL6>

1.Dirección de correo electrónico

2.Nombre y apellidos

3.Hospital

4.Servicio

5.¿Es usted residente o cirujano? Residente/cirujano

6. ¿Cuántos años hace que terminó la residencia? <5 años, 5-10 años o >10 años

7. ¿Para qué tipo de hospital trabaja? (Hospital universitario público / Hospital universitario privado / Hospital público / Hospital privado / Otro *

8. ¿Cuántos pacientes con enfermedad de apendicitis aguda fueron remitidos a su hospital en un mes antes de la pandemia de COVID-19? (<5; 5-10; 10-20;> 20)

9.. ¿Cuántos pacientes con enfermedad de apendicitis aguda son remitidos a su hospital en un mes durante la pandemia de COVID-19? (<5; 5-10; 10-20;> 20)

10. ¿Qué porcentaje de todos los pacientes con apendicitis aguda no complicada (sin absceso) se someten a un tratamiento conservador con antibióticos en su centro antes de la pandemia de COVID-19? (<25%; 26-50%; 51-75%; 76-100%)

11. ¿Qué porcentaje de todos los pacientes con apendicitis aguda no complicada (sin absceso) se someten a un tratamiento conservador con antibióticos en su centro durante la pandemia de COVID-19? (<25%; 26-50%; 51-75%; 76-100%)

12. ¿Qué porcentaje de todos los pacientes con apendicitis aguda no complicada (sin absceso) tratados de manera conservadora con antibióticos son enviados a su casa y seguidos en la clínica ambulatoria de su centro antes de la pandemia de COVID-19? (<25%; 26-50%; 51-75%; 76-100%)

13. ¿Qué porcentaje de todos los pacientes con apendicitis aguda no complicada (sin absceso) tratados de forma conservadora con antibióticos son enviados a su casa y seguidos en la clínica ambulatoria de su centro durante la pandemia de COVID-19? (<25%; 26-50%; 51-75%; 76-100%)

14. ¿Qué porcentaje de todos los pacientes con apendicitis aguda complicada con absceso) se someten a un tratamiento conservador con antibióticos +/- drenaje percutáneo en su centro antes de la pandemia de COVID-19? (<25%; 26-50%; 51-75%; 76-100%)

15. ¿Qué porcentaje de todos los pacientes con apendicitis aguda complicada con absceso se someten a un tratamiento conservador con antibióticos +/- drenaje percutáneo en su centro durante la pandemia de COVID-19? (<25%; 26-50%; 51-75%; 76-100%)

16. ¿Qué porcentaje de todos los pacientes con apendicitis aguda tratados con cirugía se someten a una apendicectomía abierta en su centro antes de la pandemia de COVID-19? (<25%; 26-50%; 51-75%; 76-100%)

17. ¿Qué porcentaje de todos los pacientes con apendicitis aguda tratados con cirugía se someten a una apendicectomía abierta en su centro durante la pandemia de COVID-19? (<25%; 26-50%; 51-75%; 76-100%)

18. Si se realizó una cirugía laparoscópica, ¿utilizó algún sistema de filtro de evacuación de CO2? (Sí No)

19. Si se usa filtro, ¿qué tipo de dispositivo utiliza? (Sello de aire, filtro respiratorio / filtro respiratorio conectado al sello líquido / otro)

20. ¿Cambió su protección durante cualquier cirugía? (opciones sumatorias) (Cualquier cambio, Mascarilla FFP2 / Mascarilla FFP3 / Equipo personal de protección específico / Cualquier protección ocular)

21. Desde la pandemia de COVID-19, ¿cómo cambió su hospital su organización? (Mi hospital está dedicado exclusivamente a pacientes con COVID-19 / Mi hospital tiene áreas restringidas dedicadas a pacientes con COVID-19 / Mi hospital no trata a pacientes con COVID-19)

22. Según los escenarios para diferentes fases de alerta COVID-19 propuestos por la AEC, en que situación se encontraría su centro (I (escenario casi normal), II (Escenario de alerta elve), III (Escenario de alerta media), IV (escenario de alerta alta) y V (Escenario de emergencia)

23. ¿Detecta rutinariamente pacientes con infección por COVID-19 con apendicitis antes de la cirugía? (Sí, todos los pacientes / No / Sí, solo pacientes con síntomas respiratorios o sospechosos de infección por COVID-1

24. ¿Cómo evalúa a los pacientes con COVID-19 antes de la cirugía? (Rx Torax / CT scan / PCR test / Serología)

25.¿Existe algún paciente en su centro que se complicó después de la apendicectomía en relación con la infección COVID-19? Si/No/No lo sé
