# Supplementary material
Source: Elsevier journal article supplement (https://www.sciencedirect.com/science/article/pii/S2173507721001502)
Supplement: mmc2 [file S2173507721001502:mmc2.docx]

Anexo 2: Colaboradores. Nombre, Apellido y Hospital de referencia

| Oriana Barrios | Hospital Universitario de Bellvitge |
| --- | --- |
| Lorena Arrabal | Hospital Universitario de Donostia |
| Andrea Jiménez Salido | Hospital Comarcal d’Al Penedés |
| Lucía Granero Peira | Clí­nica Universidad de Navarra (Madrid) |
| Andrea Goikoetxea Urdiain | Complejo Hospitalario de Navarra |
| María Angeles De Paz Monteagudo | Hospital Universitario El Bierzo |
| Jordi Comajuncosas Camp | Parc Sanitari Sant Joan de Déu |
| Alberto López Farias | Hospital de Mérida |
| Lucía Granero Peira | Clínica Universidad de Navarra |
| Mª de los Angeles Mayo Ossorio | Hospital Universitario Puerta del Mar |
| Juan Carlos Primo Álvarez | Hospital Universitario El Bierzo |
| Felipe Parea Ciuro | Hospital Universitario Virgen del Rocío |
| Carolina Martínez | Hospital General Universitario de Valencia |
| Benedetto Ielpo | Hospital de León |
| Beatriz de Andrés Asenjo | Hospital Clínico Universitario de Valladolid |
| Raquel León Ledesma | Hospital Universitario de Getafe |
| Jorge Baixauli Fons | Clínica Universidad de Navarra |
| Luca Ponchietti | Hospital General San Jorge |
| Francisco Miguel González Valverde | Hospital General Universitario Reina Sofía de Murcia |
| José Noguera Aguilar | Complejo Hospitalario Universitario A Coruña |
| Rajesh Gianchandani Moorjani | Hospital Universitario Nuestra Señora de Candelaria |
| Gozáñez Conde | Complexo Hospitalario Universitario de Ourense |
| Aingeru Sarriugarte Lasarte | Hospital Universitario Cruces |
| Beatriz Gómez Pérez | Hospital Universitario Virgen de la Arrixaca |
| Javier Rivera Castellano | Hospital Verge de la Cinta |
| Ana Delegido García | Hospital Universitario Virgen de la Arrixaca |
| José Andrés Ortega Seda | Hospital Universitario Juan Ramón Jiménez |
| Miguel Ruiz Marín | Hospital General Universitario Reina Sofía de Murcia |
| Juan José Ruiz Manzanera | Hospital Universitario Virgen de la Arrixaca |
| Felipe Alconchel | Hospital Universitario Virgen de la Arrixaca |
| Elena Pérez Rodríguez | Complexo Hospitalario Universitario de Santiago de Compostela |
| Juan José Ruiz Manzanera | Hospital Universitario Virgen de la Arrixaca |
| Víctor Turrado-Rodríguez | Hospital Clí­nic de Barcelona |
| Estefanía Domenech | Hospital de Torrevieja |
| Mariela Florez Gamaraa | Hospital Sanitas La Moraleja |
| Rubén Caía Ruiz | Hospital Universitario Marqués de Valdecilla |
| Ana Isabel Gutierrez Fernández | Hospital Universitario Virgen de la Arrixaca |
| José María Jover Navalón | Hospital Universitario de Getafe |
| Francisco Javier Tejero Pintor | Hospital Universitario Rí­o Hortega |
| Juan Carlos Martín del Olmo | Hospital de Medina del Campo |
| Janire Mateo Retuerta | Hospital Universitario de Galdakao |
| Ruben Ciria | Hospital Universitario Reina Sofía de Córdoba |
| Omar Abdel-lah Fernández | Hospital Clí­nico Universitario |
| Angela Bauls Matoses | Hospital Francesc de Borja |
| Javier López Morales | Hospital de la Vega Lorenzo Guirao |
| Gonzalo P. Martin-Martin | Hospital Cima Barcelona |
| Salvador Morales-Conde | Hospital Quironsalud Sagrado Corazón |
| Eneko Del Pozo Andrés | Hospital Universitario de Galdakao |
| Imanol Herrero LÃ³pez | Hospital Universitario de Araba |
| Ibabe Villalabeitia | Hospital Universitario Cruces |
| Patricia Sendino | Hospital Universitario Cruces |
| Estela Membrilla-Fernández | Hospital Del Mar |
| Alfredo Escartín Arias | Hospital Arnau de Vilanova Valencia |
| María Pia | Hospital Universitario Clínico San Cecilio |
| Montiel Jiménez Fuertes | Hospital Universitario Fundación Jiménez Díaz |
| José Manuel Couselo Villanueva | Hospital Universitario Lucus Augusti Lugo |
| Mario Rodríguez-Lopez | Hospital Clínico Universitario de Valladolid |
| Alejandro Perez Alonso | Hospital Universitario Virgen de las Nieves |
| Cristina Álvarez Segurado | Hospital Universitari Son Espases |
| Mikel Prieto Calvo | Hospital Universitario Cruces |
| Mario Serradilla Martin | Hospital Universitario Miguel Servet |
| Fernando Pardo Aranda | Hospital Universitario Germans Trías i Pujol |
| Antonio Satorras Fioretto | Hospital da Costa Burela |
| Andrea Cisneros | Hospital Hospital Universitario Clínico San Cecilio |
| María Teresa Albiol Quer | Hospital Universitari Dr Josep Trueta |
| Carlos Petrola ChacÃ³n | Hospital Universitario Vall d'Hebron |
| Mª Dolores Pérez Diaz | Hospital General Universitario Gregorio Marañón |
| Olatz Ocerin Alganza | Hospital Universitario Cruces |
| Cristina Rey Valcárcel | Hospital General Universitario Gregorio Marañón |
| Juan Ignacio Rodríguez Campos | Hospital del Oriente de Asturias Francisco Grande Covián |
| Andrés García Fernández | Hospital Clínico San Carlos |
| Zoilo Madrazo González | Hospital Universitario de Bellvitge |
| Sergio González Hernández | Hospital Universitario de Canarias |
| Jordi Roura | Hospital Universitari General de Catalunya |
| Seamus Mac Mathuna | Hospital Universitario de Jerez de la Frontera |
| Diego Antonio Bernal Moreno | Hospital Universitario Puerto Real |
| Alberto Martínez Peral | Hospital Universitario Lucus Augusti Lugo |
| Carolina Beiras Sarasquete | Hospital Clínico Universitario de Santiago |
| Débora Acín Gándara | Hospital Universitario de Fuenlabrada |
| Joan Borrás Marcet | SCIAS - Hospital de Barcelona |
| Germán Mínguez Ruiz | Hospital Universitario San Agustín |
| Izaskun Balciscueta | Hospital Universitario De La Rivera |
| Ruiz Oscar Elena | Hospital Universitario de Fuenlabrada |
| Toni Veres | Hospital de la Cerdanya |
| Noelia Ibáñez Cánovas | Hospital Universitario Rafael Méndez |
| Isabel María Gallarin | Hospital Universitario de Badajoz |
| José Antonio López Ruiz | Hospital Universitario Virgen Macarena |
| Silvia García | Hospital San Eloy |
| Mª Ángeles Boleko Rivas | Hospital Universitari Dexeus |
| Andrea Campos Serra | Consorci Corporació Sanitària Parc Taulí |
| Gemma Sugrañes Naval | Hospital Sant Joan de Déu de Parc Sanitari Sant Joan de Déu |
| Isabel Gascón Ferrer | Hospital Universitario Miguel Servet |
| Laura Fernández Gómez-Cruzado | Hospital de Urduliz Alfredo Espinosa |
| Myriam Fernandez Isart | Hospital Universitari Son Espases |
| Lucas Casalduero García | Hospital Universitario Príncipe de Asturias |
| Ismael Mora-Guzmán | Hospital Santa Bárbara |
| José Felipe Reoyo Pascual | Hospital Universitario de Burgos |
| Ladislao Cayetano Paniagua | Consorci Sanitari de Terrassa |
| Amaia Martínez Roldan | Hospital Universitario de Galdakao |
| María Victoria Fernandez Illera | Hospital San Eloy |
| Javier Ulecia Moreno | Hospital La Línea de la Concepción |
| Sara Ortiz de Guzmán | Hospital Universitario Cruces |
| Natividad Partearroyo | Hospital Universitario de Basurto |
| Jacobo Trébol López | Complejo Asistencial Hospitalario de Salamanca |
| Mª Rosario San Román Romanillos | Hospital Universitario Príncipe de Asturias |
| Gabriela Romay Cousido | Complejo Hospitalario Universitario A Coruña |
| Vicente Portugal Porras | Hospital Universitario de Galdakao |
| Pablo Rodríguez Garcí­a | HGU Santa Lucí­a |
| Juana Morante Castaño | Hospital Universitario de Guadalajara |
| María Sebastián | Hospital Universitario De La Rivera |
| Estibaliz Álvarez Peña | Hospital La Luz |
| MD Frutos | Hospital Universitario Virgen de la Arrixaca |
| José Ignacio Martín Parra | Hospital Universitario Marqués de Valdecilla |
| Igor Alberdi San Román | Hospital San Eloy |
| Luis Tallón-Aguilar | Hospital Universitario Virgen del Rocío |
| Juan Ramón Gómez López | Hospital de Medina del Campo |
| Alejandro Serrablo Requejo | Hospital Universitario Miguel Servet |
| Francisco A. Herrera Fernández | Hospital Santa Ana |
| Francisco Javier Landete Molina | Hospital General de Requena |
| Esteban Martín Antona | Hospital Clínico San Carlos |
| Javier Serradilla Rodriguez | Hospital Universitario La Paz |
| Víctor Soria Aledo | Hospital General Universitario Morales Meseguer |
| Mauro Valentini | Hospital General de Granollers |
| Milagros Carrasco Prats | Hospital General Universitario Reina Sofía de Murcia |
| Laia Falgueras Verdaguer | Hospital Universitari Dr Josep Trueta |
| Felisa Díaz Gomez | Hospital de Lliria |
| Yanina Kataryniuk Di Costanzo | Hospital Universitario Cruces |
| Aída Tébar Zamora | Hospital Virgen de la Salud |
| Zoraida Valera Sánchez | Hospital Universitario Virgen Macarena |
| Salvador Calzado Baeza | Hospital Santa Ana |
| Soledad Montón Condón | Hospital Garcia Orcoyen |
| Jose Mª Lloret Espí | Clínica HLA Vistahermosa |
| Rocío Estepa Cabello | Hospital Universitario de Jerez de la Frontera |
| Pablo Menéndez Sánchez | Hospital General de Valdepeñas |
| Aitor Landaluce Olavarria | Hospital de Urduliz Alfredo Espinosa |
| Sylvia Maestro | Hospital Central de la Defensa |
| Manuel Artiles Armas | Hospital Universitario de Gran Canaria Doctor Negrín |
| Raquel María Fresnedo Pérez | Hospital Universitario de Cabueñes |
| Jesús Cañete Gómez | Hospital Universitario de Valme |
| Carlota García Fernandez | Hospital San Pedro ( Logroño) |
| Juan Carlos J. Trujillo Dí­az | Hospital Clínico Universitario de Valladolid |
| Antonio Navarro-Sánchez | Complejo Hospitalario Universitario Insular Martino -Infantil |
| Jaime Bonnán Pascual | Hospital Universitari Son Espases |
| Eugenio Licardie | Quisonsalud Sagrado Corazón |
| Álvaro Naranjo Torres | Hospital Universitario Reina Sofía de Córdoba |
| Pablo Lozano Lominchar | Hospital General Universitario Gregorio Marañón |
| Javier Broekhuizen Benitez | Hospital General Nuestra Señora del Prado |
| Andrea Craus Miguel | Hospital Universitari Son Espases |
| Rosa María Saborit Montalt | Hospital Lluís Alcanyís de Xàtiva |
| Inmaculada González Barrales | Fundació Sanitaria Hospital de Mollet |
| José Cutillas Abellón | Hospital Francesc de Borja |
| José Ángel Diez Ares | Hospital Doctor Peset |
| Sef Sauda Moro | Hospital Universitario Miguel Servet |
| Diego Flores Funes | Hospital General Universitario Morales Meseguer |
| María Jesús Segura | Hospital de Sagunto |
| Oscar Roberto Marqueta García | Hospital Central de la Defensa |
| Gemma Sugrañes Naval | Hospital Sant Joan de Déu de Parc Sanitari Sant Joan de Déu |
| Mónica Serrano Navidad | Hospital Universitario de Bellvitge |
| Alberto Felipe Bravo Gutiérrez | Hospital Universitario de Canarias |
| Dieter Morales García | Hospital Universitario Marqués de Valdecilla |
| Carlos Yanez Benitez | Hospital Royo Villanova |
| Vicente Olivares Ripoll | Hospital Quironsalud Murcia |
| Sara Nicolás De Cabo | Hospital Regional Universitario Carlos Haya |
| Juan Luis Blas Laina | Hospital Royo Villanova |
| Carles Olona Casas | Hospital Universitari de Tarragona Joan XXIII |
| Olga Claramonte Bellmunt | Hospital Universitario Son Llàtzer |
| Laura Lázaro | Hospital Universitari Dexeus |
| Ozlen Uyanik | ConsorciI Sanitari del Garraf, Hospital Residència Sant Camil |
| Tihomir Georgiev Hristov | Hospital General de Villalba |
| Cristina Plata Illescas | Hospital Universitario Virgen de las Nieves |
| Antonio Uceda Vaño | Hospital Alto Guadalquivir |
| Alicia Ruiz de la Hermosa | Hospital Universitario Infanta Leonor |
| F. Borja de Lacy | Hospital Clí­nic de Barcelona |
| Jordi Palacín Luque | Pius Hospital de Valls |
| Juan Carlos Alados | Hospital Universitario de Badajoz |
| Oscar Cano | Hospital Clínico San Carlos |
| Antonio Jesús González Sánchez | Hospital Regional Universitario Carlos Haya |
| Cristina Martínez | Hospital Costa del Sol |
| Roberto Fernández Santiago | Hospital Universitario Marqués de Valdecilla |
| José María Daroca José | Hospital Universitario de La Plana |
| Susana Roldán Ortiz | Hospital Universitario Puerta del Mar |
| Miguel Ángel Freiria Eiras | Hospital HM Rosaleda |
| Amando Marchal Santiago | Hospital San Agustín |
| Elisa Jiménez Higuera | Hospital General Universitario de Ciudad Real |
| Raquel Lacomba montes | Complejo Hospitalario de Navarra |
| Alberto Díaz Garcí­a | Hospital Universitario Nuestra Señora de Candelaria |
| Miriam Flores | Hospital General de Granollers |
| Diana Navas Carrillo | Hospital de la Vega Lorenzo Guirao |
| Álvaro Hernández Pérez | Complejo Asistencial de Ávila |
| Jorge Choliz Ezquerro | Hospital Universitario Miguel Servet |
| Francisco Gil Piedra | Hospital de Laredo |
| Celia Báez | Hospital General Universitario de Valencia |
| Janice Velasco | Hospital Municipal de Badalona |
| Ramón Soliva Domínguez | Hospital Universitari Sagrat Cor |
| Ricardo Montenegro Romero | Complexo Hospitalario Universitario de Santiago de Compostela |
| Rubén Moreda Álvarez | Complexo Hospitalario Universitario de Ourense |
| Beatriz Muñoz Jiménez | Complejo Hospitalario Universitario de Toledo |
| Vincenzo Vigorita | Hospital Alvaro Cunqueiro |
| Marta Cuadrado Ayuso | Hospital Universitario Ramón y Cajal |
| Lourdes Fernández Bobadilla Olazábal | Hospital HLA Universitario Moncloa |
| Mauro Valentini | Hospital General de Granollers |
| Paula Troncoso Pereira | Hospital General Mateu Orfila |
| Juan E Basualdo Ormezo | Hospital FAC doctor Pascual |
| Víctor Soriano Giménez | Hospital Universitario Rafael Méndez |
| Thomas W. Jorgensen | Hospital Central Cruz Roja San José y Santa Adela |
| Isabel María Cornejo Jurado | Hospital Universitario Virgen Macarena |
| María Socias Seco | H. Sant Joan de Déu de Parc Sanitari Sant Joan de Déu |
| Alejandro Moreno Bargueiras | Hospital Universitario12 de octubre |
| Alexander Salazar Báez | Parc Sanitari Sant Joan de Déu |
| Laura Millán | Hospital Dr José Molina Orosa |
| Raquel Sánchez | Complejo Hospitalario Universitario de Vigo |
| Eduardo Alberto Rodríguez Martínez | Hospital General Universitario de Alicante |
| Pere Planellas | Hospital Universitari Dr Josep Trueta |
| Eva Ramos García | Hospital HLA Universitario Moncloa |
| Francisco Marrero Álvarez | Hospital General de La Gomera |
| Isabel MarÍa Muñoz | Hospital Santa Ana |
| Marlen Alvite Canosa | Complejo Hospitalario Universitario de Ferrol |
| Lucía Garrido López | Complejo Hospitalario Universitario de Vigo |
| Carmen Teido Sánchez | Hospital La Línea de la Concepción |
| Tatiana Velarde | Hospital Central de la Defensa |
| Tomás Balsa | Hospital General Nuestra Señora del Prado |
| Carmen Rodríguez Haro | Hospital Universitario Infanta Sofía |
| Manuel Prados | Hospital Universitari Dexeus |
| Pilar Serrano Paz | Hospital del Vinalopó |
| Carolina Arcos Quirós | San Juan de Dios Aljarafe |
| Claudio Antonio Guariglia | Fundación Althaia Hospital Universitario de Manresa |
| Héctor Aguado López | Hospital de Hellín |
| Carmen Quesada Peinado | Hospital Universitario de Jaén |
| Ernesto Jesús Barzola Navarro | Complejo Asistencial de Ávila |
| Antonio Calvo Duran | Hospital Universitario Puerto Real |
| José J. Ceballos Esparragón | Vithas Hospital Santa Catalina |
| Ester Alonso Batanero | Hospital Universitario Central de Asturias |
| Jose Farre Alegre | Hospital Quironsalud Torrevieja |
| María Jesús Castro Santiago | Hospital Universitario Puerta del Mar |
| Virginia Jiménez Carneros | Hospital Universitario de Getafe |
| Laura Caubet Domingo | Hospital Arnau de Vilanova Valencia |
| Miguel Hernández García | Hospital Universitario del Sureste |
| Martin De Jesús Rodríguez Perdomo | Hospital Universitario Torrecárdenas |
| Clara Giménez Francés | Hospital General Universitario Reina Sofía de Murcia |
| Antonio Jesús Muñoz-Serrano | Hospital Universitario La Paz |
| Mar Pardo de Lama | Hospí¬tal Universitario Fundación Alcorcón |
| José Carlos Fernández Fernández | Hospital Universitario de Cabueñes |
| Cristina Martínez Chicote | Hospital Universitari i Politècnic La Fe |
| Jose María Octavio de Toledo Ubieto | Complexo Hospitalario Universitario de Ourense |
| Germán Mateu Calabuig | Espitau Val d'Aran |
| Melody Garcí­a Domí­nguez | Hospital General San Jorge |
| Ferdinando Massimiliani Anelli | Hospital Universitario Reina Sofía de Córdoba |
| Andrés Gallardo Ortega | Hospital La Inmaculada de Huércal-Overa |
| José Manuel Fernández Fernández | Hospital Universitario de Ceuta |
| Juan Carlos Pastor Mora | Hospital Vithas Nisa Rey Don Jaime |
| Francisco José Ramos Soler | Hospital General Universitario Morales Meseguer |
| Inmaculada Torrijo Gomez | Hospital Arnau de Vilanova Valencia |
| Cristina Marco Continente | Hospital de Mérida |
| Jaime Jimeno | Hospital Universitario Marqués de Valdecilla |
| Laura Comín Novella | Hospital Ovispo Polanco |
| Ane Vesga | Hospital Mendaro |
| María Rosario San Román Romanilloas | Hospital Universitario Príncipe de Asturias |
| Victoria Mª Maderuelo García | Complejo Asistencial Universitario de Palencia |
| Gemma Sugrañes Naval | Hospital Sant Joan de Déu de Parc Sanitari Sant Joan de Déu |
| Carlos Loureiro González | Hospital Universitario de Basurto |
| Carlos Delgado Miguel | Hospital Infantil La Paz |
| Piero Alberti Delgado | Hospital Universitario Vall d'Hebron |
| Ana Alberca Páramo | Hospital Infanta Margarita |
| Pablo Calvo Espino | Hospital Universitario de Móstoles |
| Patricia Alonso Carnicero | Hospital Universitario Cruces |
| Luigi Antinolfi | Clinico Universitario Lozano Blesa Zaragoza |
| Pablo del Pozo | Hospital de la Vega Lorenzo Guirao |
| Fátima Sena Ruiz | Hospital Comarcal de Inca |
| Ana Ciscar Bellés | Hospital de Mataró |
| Vanesa Crespo Garcí­a del Castillo | Hospital General de Valdepeñas |
| Amparo Carrocera Cabal | Hospital Universitario de Cabueñes |
| Belén Conde Inarejos | Hospital General de Albacete |
| Tamara Montoto Fernández | Hospital Bidasoa |
| Juan Sebastián Malo Corral | Hospital Virgen de la Salud |
| Aurelio Matos Mascareño | Hospiten Rambla |
| Pamela Vivas | Consorci hospitalario Alt Penedes Garraf |
| Amador García Ruiz de Gordejuela | Hospital Universitario Vall d'Hebron |
| Daniel Aparicio López | Hospital Universitario Miguel Servet |
| Eva Nogués Ramia | Hospital Universitario de Gran Canaria Doctor Negrín |
| Pawel Malec | HospitalSantos Reyes |
| Cristina Vera Mansilla | Hospital Universitario Príncipe de Asturias |
| David Pacheco Sánchez | Hospital Universitario Rí­o Hortega |
| Antonio Adolfo Nieto Soler | Hospital de Mérida |
| Paloma Maté Mate | Hospital Universitario Infanta Sofía |
| María Conde Rodríguez | Hospital Universitario Lucus Augusti Lugo |
| Miriam Abellán Lucas | Hospital Universitari de Tarragona Joan XXIII |
| Catalina María Uribe Galeano | Parc Sanitari Sant Joan de Déu |
| Isidro Moreno Toril | Hospital Valle de Los Pedroches |
| Rocio Molina Barea | Hospital Universitario de Jaén |
| Olga Maseda Díaz | Hospital Universitario Lucus Augusti Lugo |
| Raúl Medina Velázquez | Hospital Universitario de Gran Canaria Doctor Negrín |
| Carlos David Trujillo Flores | Hospital QuironSalud Tenerife |
| Santiago de la Puente Pérez | Hospital Infantil Universitario Niño Jesús |
| Álvaro Navarro Barrios | Hospital Universitario Virgen de la Arrixaca |
| Jhonny Ferrufino | Hospital Universitario Puerto Real |
| Aleandra Gordillo | Hospital Vithas Nisa Sevilla |
| Javier Ulecia Moreno | Hospital La Línea de la Concepción |
| Lourdes Hernández Cosido | Complejo Asistencial Hospitalario de Salamanca |
| Inma Medina López | Complexo Hospitalario Universitario de Santiago de Compostela |
| Merce Guell Farre | Fundación Althaia Hospital Universitario de Manresa |
| Jesús Segui­ Gregori | Hospital Francesc de Borja |
| Lourdes Hernández Martí­nez | Hospital Comarcal d’Al Penedés |
| Juan Carlos de Agustín Asensio | Hospital General Universitario Gregorio Marañón |
| Arturo del Rey Moreno | Hospital de Antequera |
| Elena María Aranda Escaño | Hospital Universitario Cruces |
| Elena Pérez Prudencio | Hospital Universitario de Cabueñes |
| Miriam Tellaeche | Hospital Universitario Cruces |
| Cristina Mosquera Fernández | Hospital da Costa Burela |
| Nikolas Palma Caucig | Hospital General Universitario Gregorio Marañón |
| Rocio Sosa Medina | Hospital Santiago Apóstol |
| Jesús Santos Naharro | Hospital Universitario de Badajoz |
| Marí­a Garcí­a Ávila | Hospital Virgen de la Salud |
| Sara Fuentes | Hospital Universitario Mutua de Terrassa |
| Juan Carlos Rodrí­guez Díaz | Fundación Hospital de Jove |
| Marí­a Lirios Ferri Candela | Hospital Virgen de los Lirios |
| Laura Vega Lope | Hospital Universitario Fundación Alcorcón |
| David Sánchez Relinque | Hospital Punta de Europa |
| Helga Kristiina Kalviainen Mejia | Hospital Universitario Miguel Servet |
| Marí­a Pitarch Martí­nez | Hospital Infanta Margarita |
| Joserra Torres | Hospital Universitario Fundación Jiménez Díaz |
| Alicia Alvarellos Perez | Hospital Universitario Fundación Jiménez Díaz |
| David Alías Jiménez | Hospital Universitario Rey Juan Carlos |
| Alberto Fernández López | Hospital Comarcal de la Axarquía |
| Juan Garífano | Hospital Central de la Defensa |
| Borja Santos Zorrozúa | Biocruces Bizkaia Health Research Institute |
